# Supplementary material
Source: publisher site journal article supplement (https://www.dovepress.com/article/423251)
Supplement: Supplementary file 1 [file get_supplementary_file.php]

# Supplementary materials

**Table S1.** Analysis of measured responses variance of the final models.

| **Parameters** | **SS** | **DF** | **MS** | **F** | **p-value** |
| --- | --- | --- | --- | --- | --- |
| **EE%** | | | | | |
| Block | 0.090 | 2 | 0.045 |  |  |
| Model (Quadratic) | 25393.12 | 11 | 2308.47 | 26.47 | < 0.0001 |
| A-A Amount of lipid | 6.75 | 1 | 6.75 | 0.077 | 0.782 |
| B-B Amount of surfactant | 196.69 | 1 | 196.69 | 2.26 | 0.139 |
| C-C Type of surfactant | 380.85 | 2 | 190.42 | 2.18 | 0.123 |
| AB | 8793.47 | 1 | 8793.47 | 100.82 | < 0.0001 |
| AC | 6679.59 | 2 | 3339.79 | 38.29 | < 0.0001 |
| BC | 6184.70 | 2 | 3092.35 | 35.46 | < 0.0001 |
| A2 | 2712.70 | 1 | 2712.70 | 31.10 | < 0.0001 |
| B2 | 79.98 | 1 | 79.98 | 0.92 | 0.343 |

| **Parameters** | **SS** | **DF** | **MS** | **F** | **p-value** |
| --- | --- | --- | --- | --- | --- |
| **Vesicle size** | | | | | |
| Block | 0.084 | 2 | 0.042 |  |  |
| Model (2F1) | 12.41 | 9 | 1.38 | 15.20 | < 0.0001 |
| A-A Amount of lipid | 0.41 | 1 | 0.41 | 4.57 | 0.037 |
| B-B Amount of surfactant | 0.61 | 1 | 0.61 | 6.75 | 0.012 |
| C-C Type of surfactant | 7.35 | 2 | 3.67 | 40.52 | < 0.0001 |
| AB | 0.55 | 1 | 0.55 | 6.07 | 0.017 |
| AC | 2.61 | 2 | 1.31 | 14.40 | < 0.0001 |
| BC | 0.62 | 2 | 0.31 | 3.42 | 0.040 |

| **Parameters** | **SS** |  | **MS** | **F** | **p-value** |
| --- | --- | --- | --- | --- | --- |
| **PDI** | | | | | |
| Block | 0.012 | 2 | 6.062  x10-3 |  |  |
| Model (2F1) | 0.79 | 9 | 0.088 | 8.33 | < 0.0001 |
| A-A Amount of lipid | 2.288  x10-5 | 1 | 2.288 x10-5 | 2.174 x10-3 | 0.963 |
| B-B Amount of surfactant | 0.023 | 1 | 0.023 | 2.20 | 0.144 |
| C-C Type of surfactant | 0.45 | 2 | 0.22 | 21.29 | < 0.0001 |
| AB | 0.026 | 1 | 0.026 | 2.45 | 0.123 |
| AC | 0.22 | 2 | 0.11 | 10.54 | 0.0001 |
| BC | 0.064 | 2 | 0.032 | 3.06 | 0.055 |

| **Parameters** | **SS** | **DF** | **MS** | **F** | **p-value** |
| --- | --- | --- | --- | --- | --- |
| **Zeta Potential** | | | | | |
| Block | 7.22 | 2 | 3.61 |  |  |
| Model (Quadratic) | 272.46 | 11 | 24.77 | 14.48 | < 0.0001 |
| A-A Amount of lipid | 10.47 | 1 | 10.47 | 6.12 | 0.017 |
| B-B Amount of surfactant | 0.059 | 1 | 0.059 | 0.034 | 0.8536 |
| C-C Type of surfactant | 30.18 | 2 | 15.09 | 8.82 | 0.0005 |
| AB | 91.77 | 1 | 91.77 | 53.63 | < 0.0001 |
| AC | 61.52 | 2 | 30.76 | 17.98 | < 0.0001 |
| BC | 46.65 | 2 | 23.32 | 13.63 | < 0.0001 |
| A2 | 8.27 | 1 | 8.27 | 4.84 | 0.0323 |
| B2 | 13.82 | 1 | 13.82 | 8.08 | 0.0064 |

**Table S2.** Kinetic analysis of in vitro release results.

| **Formulation** | **Correlation coefficient (R2) *** | | | | **(n) ***  **Korsmeyer–Peppas equation** |
| --- | --- | --- | --- | --- | --- |
| **Zero order** | **1st order** | **Higuchi diffusion** | **Korsmeyer–Peppas** |
| **Curcumin Trans-in situ gel** | 0.9706 ± 0.005 | 0.9895 ± 0.004 | 0.9855 ± 0.003 | 0.9727 ± 0.023 | 1.182 ± 0.148 |
| **Free curcumin -in situ gel** | 0.9568 ± 0.015 | 0.9609 ± 0.016 | 0.9855 ± 0.008 | 0.9549 ± 0.014 | 0.642 ± 0.028 |
| **Curcumin Trans dispersion** | 0.9305 ± 0.009 | 0.9332 ± 0.009 | 0.9592 ± 0.006 | 0.9561 ± 0.014 | 1.09 ± 0.194 |
| **Curcumin dispersion** | 0.8444 ± 0.071 | 0.8457 ± 0.071 | 0.9224 ± 0.066 | 0.9099 ± 0.026 | 0.5312 ± 0.064 |

***** Mean ± S.D (n= 3) are presented.

**Figure S1** Proportions of permeated amount of curcumin from transferosomes in-situ gel formulation, and free drug loaded in-situ gel across nasal mucosa after 24-h incubation.

**Table S3.** kinetic models fitted for ex vivo transport data.

| **Formulation** | **Correlation coefficient (R2) *** | | | | **(n) ***  **Korsmeyer–Peppas equation** |
| --- | --- | --- | --- | --- | --- |
| **Zero order** | **1st order** | **Higuchi diffusion** | **Korsmeyer–Peppas** |
| **Curcumin Trans-in situ gel** | 0.936 ± 0.046 | 0.962 ± 0.039 | 0.950 ± 0.032 | 0.974 ± 0.011 | 1.249 ± 0.046 |
| **Free curcumin -in situ gel** | 0.965 ± 0.017 | 0.968 ± 0.017 | 0.952 ± 0.014 | 0.964 ± 0.037 | 1.355 ± 0.066 |

***** Mean ± S.D (n= 3) are presented.

**Table S4.** Physicochemical evaluation of optimized curcumin transferosomes dispersion during the stability study (means ± SD, n = 3).

| **Time** | **Zero time** | | **1 month** | | **2 months** | |
| --- | --- | --- | --- | --- | --- | --- |
| **Storage Temperature** | **4 oC** | **25oC** | **4 oC** | **25oC** | **4 oC** | **25oC** |
| **Size (nm)** | 646.6 ± 60.8 | 646.6 ± 60.8 | 666.6 ± 59.2ns | 675.6 ± 64.4ns | 669.6 ± 34.2ns | 690.6 ± 39.8ns |
| **PDI** | 0.492 ± 0.05 | 0.512 ± 0.09 | 0.509 ± 0.08ns | 0.530 ± 0.07ns | 0.536 ± 0.09ns | 0.550 ± 0.07ns |
| **Zetapotential mV** | -11.2 ± 1.3 | -11.2 ± 2.5 | -10.6 ± 2.9 ns | -9.8 ± 1.5 ns | -11.1 ± 2.5 ns | -10.51 ± 3.5 ns |
| **Encapsulation efficiency %** | 83 ± 0.92 | 83 ± 0.40 | 81 ± 0.54* | 80 ± 0.51** | 78.9 ± 0.87** | 77 ± 0.59*** |

Data are represented as mean ± S.D. (*) Significantly different from the zero-time control (p < 0.05). (**) Very significantly different from the control group (p < 0.01). (***) Extremely significantly different from the control group (P < 0.001). (ns) non-significant difference compared to the control (p > 0.05). Statistical calculations of significance were performed using Student’s t-test.

**Table S5.** Physicochemical evaluation of optimized curcumin transferosomes in-situ gel formula (F7) during the stability investigation (means ± SD, n = 3).

| **Time** | **Zero time** | | | **1 month** | | | **2 months** | | |
| --- | --- | --- | --- | --- | --- | --- | --- | --- | --- |
| **Storage Temperature** | **4 oC** | **25 oC** | **40 oC** | **4 oC** | **25 oC** | **40 oC** | **4 oC** | **25 oC** | **40 oC** |
| **Clarity** | Clear | Clear | Clear | Clear | Clear | Clear | Clear | Clear | Clear |
| **pH** | 5.3  ±0.1 | 5.4  ±0.1 | 5.4  ±0.1 | 5.4  ± 0.3 ns | 5.3 ± 0.2 ns | 5.5 ±  0.1 ns | 5.5  ± 0.4 ns | 5.4  ± 0.5 ns | 5.4  ± 0.3 ns |
| **Drug content** | 98.8  ±  2.6 | 98.7  ±  1.6 | 98.8  ±  1.6 | 97.5  ±  2.25 ns | 97.3  ±  2.7 ns | 97.5  ±  1.25 ns | 97.2  ±  2.25 ns | 97.0  ±  1.15 ns | 97.3  ±  2.3 ns |
| **Viscosity**  **(m Pas. S)** | 2197  ±  202.1 | 6186.75  ±  209.6 | 19575  ±  434.2 | 2262  ±  249.2 ns | 6047  ±  41.8 ns | 18425  ±  431.23* | 1882.5  ±  84.2 ns | 5571.5  ±  616.6 ns | 17925  ±  350.0** |
| **Mucoadhesion Force**  **(m Pas.)** | 1577.83  ±  11.4 | 1567.83  ±  9.7 | 1537.833  ±  11.15 | 1562.83  ±  15.1 ns | 1556.16  ±  17.5 ns | 1542.83  ±  12.5 ns | 1544.5  ±  15.5* | 1527.8±  5.5** | 1511.167  ±  5.7 ns |

Data are displayed as mean ± S.D. (*) Significantly different from the zero-time control (p < 0.05). (**) Very significantly different from the control group (p < 0.01). (ns) non-significant difference compared to the control (p > 0.05). Statistical significance was computed using Student’s t-test.

**Figure S2** Pharmacokinetic profiles of curcumin after intranasal application of curcumin transferosomes in-situ gel and free curcumin in-situ gel.


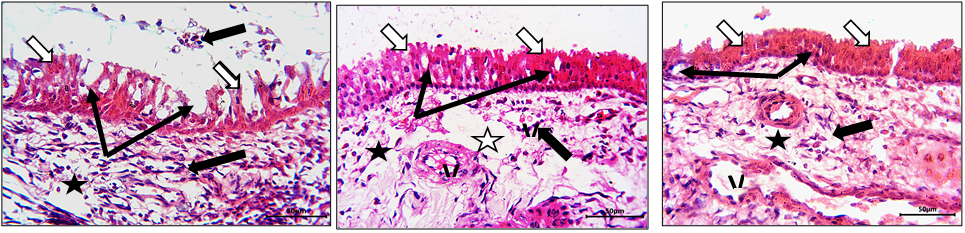


B

C

A

**Figure** **S3** Histopathological examination of rabbit`s nasal respiratory mucosa sections from (A) control untreated rabbits, (B) free drug in-situ gel treated group (C) rabbits treated with optimized curcumin transferosomes in-situ gel. The sections were stained by H&E to show normal histological features of nasal wall and intact epithelial lining. White arrows represent pseudostratified columnar epithelium, and thin black arrows represent goblet cells.
